# Supplementary material for: Boric acid-grafted biochar (BoAB) for the direct amidation of carboxylic acids and amines
Source: Royal Society of Chemistry journal article supplement (doi:10.1039/d4nj00745j), 2024-01-01
Supplement: d4nj00745j1.pdf [file d4nj00745j1.pdf]

*Supplementary Information*

**Boric Acid-Grafted Biochar (BoAB) for the Direct Amidation of  
Carboxylic Acids and Amines**

Adhish Singh<sup>a</sup>, Mohit Kapoor<sup>a\*</sup>

<sup>a</sup>Chitkara University Institute of Engineering and Technology, Chitkara  
University, 140417 Rajpura, Punjab, India

\*Corresponding authors

Email: [mohit.kapoor@chitkara.edu.in](mailto:mohit.kapoor@chitkara.edu.in)

## Contents

---

|                                                                                                                               |      |
|-------------------------------------------------------------------------------------------------------------------------------|------|
| <b>Figure S1</b> FESEM images of NBC (a, b) and BoAB (c, d) catalysts.                                                        | 1    |
| <b>Figure S2</b> XRD spectra of BoAB and NBC catalysts                                                                        | 1    |
| <b>Figure S3</b> Raman spectra of BoAB and NBC catalysts                                                                      | 2    |
| <b>Figure S4</b> FTIR spectra of BoAB and NBC catalysts                                                                       | 2    |
| <b>Figure S5</b> TGA of BoAB and NBC catalysts                                                                                | 3    |
| <b>Figure S6</b> (a) XPS survey spectra of NBC and BoAB, (b) B 1s spectra of BoAB                                             | 3    |
| <b>Figure S7</b> FTIR spectra of fresh and recycled BoAB catalysts                                                            | 4    |
| <b>Figure S8</b> Recyclability study of BoAB for amidation                                                                    | 4    |
| <b>Table S1</b> Screening of reaction conditions for the amidation of benzoic acid with N-benzylamine using biochar catalysts | 5    |
| <b>Table S2</b> BET surface area and pore volume estimation from N <sub>2</sub> adsorption/desorption isotherm                | 5    |
| NMR spectra of the obtained compounds                                                                                         | 6-15 |

---

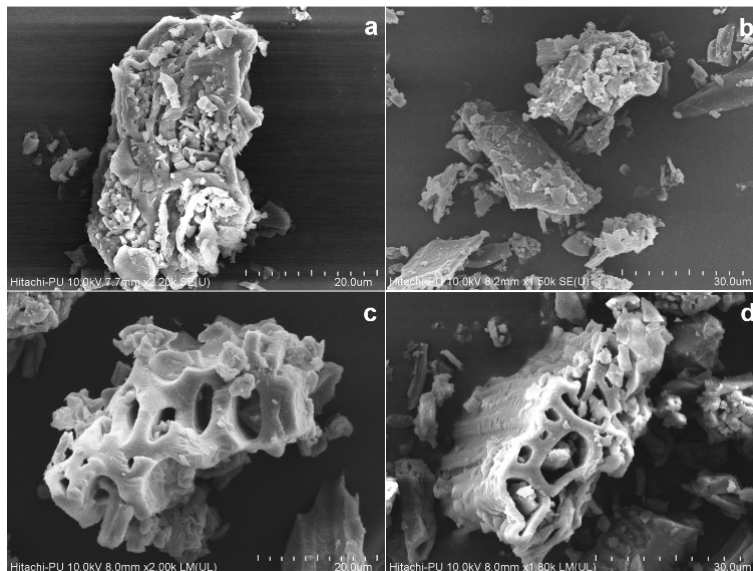

**Figure S1** FESEM images of NBC (a, b) and BoAB (c, d) catalysts.

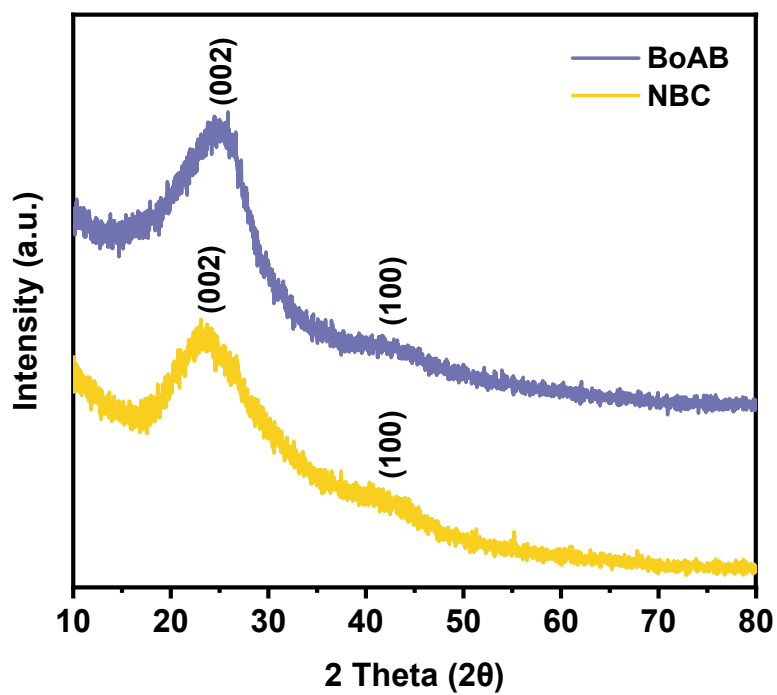

**Figure S2** XRD spectra of BoAB and NBC catalysts

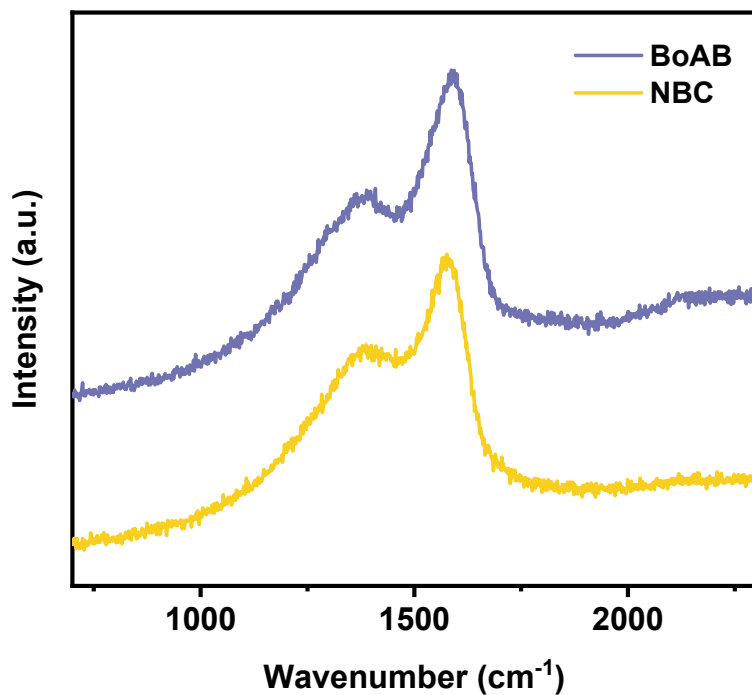

**Figure S3** Raman spectra of BoAB and NBC catalysts

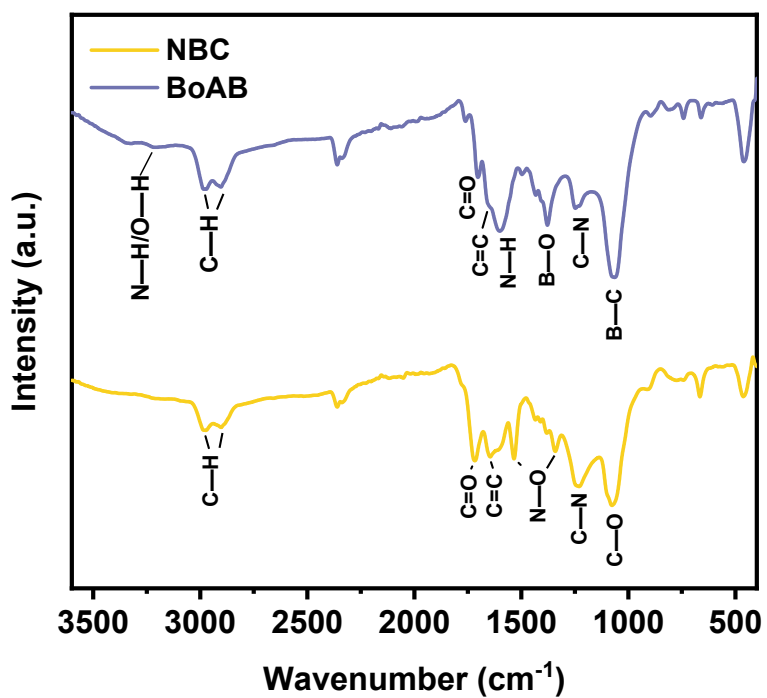

**Figure S4** FTIR spectra of BoAB and NBC catalysts

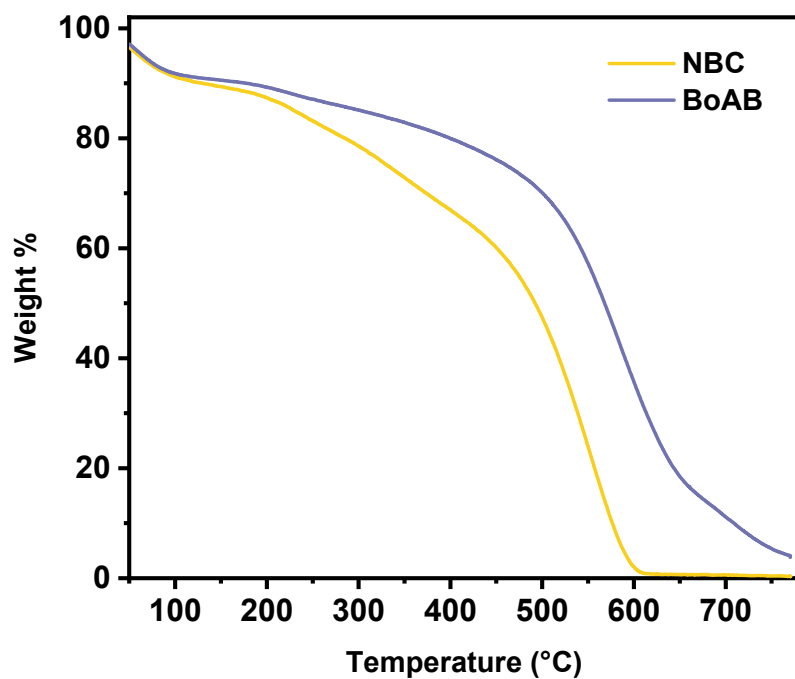

Figure S5 TGA of BoAB and NBC catalysts

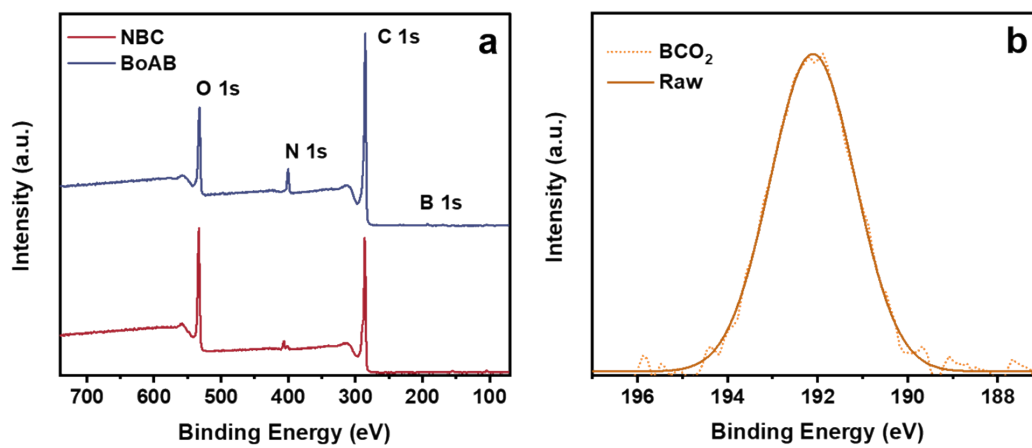

Figure S6 (a) XPS survey spectra of NBC and BoAB, (b) B 1s spectra of BoAB

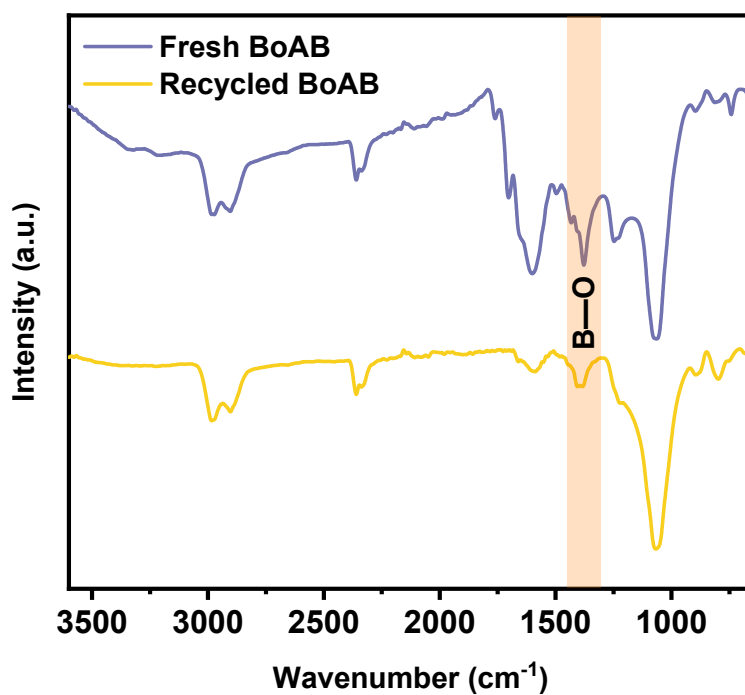

Figure S7 FTIR spectra of fresh and recycled BoAB catalyst

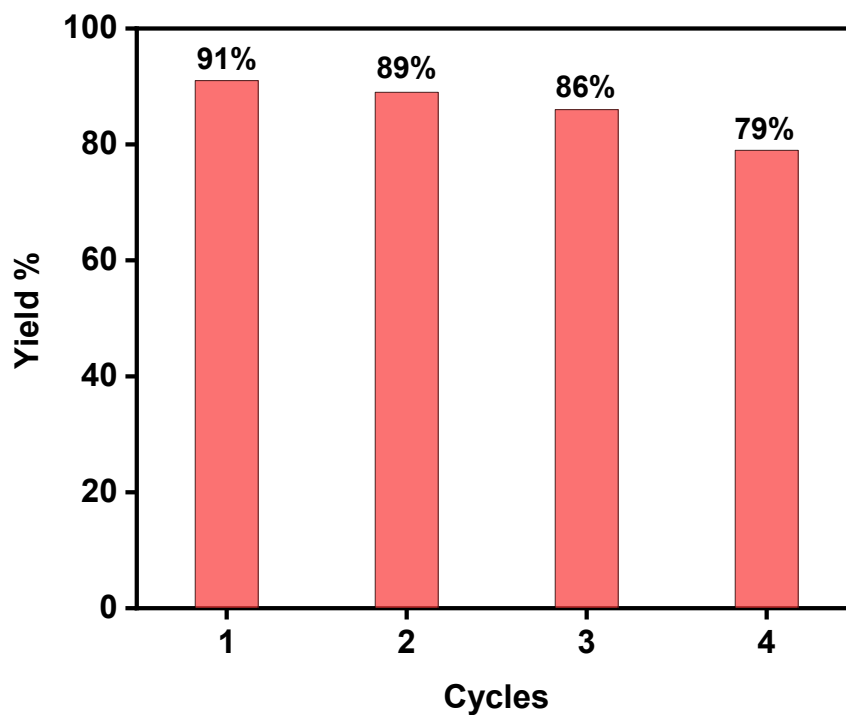

Figure S8 Recyclability study of BoAB for amidation

**Table S1** Screening of reaction conditions for the amidation of benzoic acid with N-benzylamine using biochar catalysts

| Entry | Catalyst            | Solvent | Yield (%) |
|-------|---------------------|---------|-----------|
| 1     | B(OH) <sub>3</sub>  | PhMe    | 68        |
| 2     | BC-BA <sub>p</sub>  | PhMe    | 30        |
| 3     | BC-PBA <sub>p</sub> | PhMe    | 32        |
| 4     | BC-BA               | PhMe    | 44        |
| 5     | BC-PBA              | PhMe    | 45        |
| 6     | NBC                 | PhMe    | 51        |
| 7     | BC                  | PhMe    | 29        |
| 8     | BoAB                | PhMe    | 74        |
| 9     | BoAB                | MeCN    | 25        |
| 10    | BoAB                | DCM     | 49        |

Reaction conditions: benzoic acid (1 mmol), benzylamine (1 mmol), catalyst (5 wt. %), solvent (5 mL), Dean-Stark assembly; time: 12 h, temp: 110 °C

**Table S2** BET surface area and pore volume estimation from N<sub>2</sub> adsorption/desorption isotherm

| BET Surface Area (m <sup>2</sup> /g) | Pore Volume (cm <sup>3</sup> /g) |
|--------------------------------------|----------------------------------|
| 65.93                                | 7.36                             |

## NMR spectra of the obtained compounds

**N-benzylbenzamide (3a)**<sup>1</sup> The compound was obtained as white solids with a yield of 91%.  $R_f = 0.53$  (hexane/ethyl acetate 7:3); <sup>1</sup>H NMR (500 MHz, CDCl<sub>3</sub>)  $\delta$  7.79 (d,  $J = 7.56$  Hz, 1H), 7.52 – 7.27 (m, 5H), 6.51 (s, 1H), 4.64 (d,  $J = 5.67$  Hz, 1H).

**N-benzyl-4-fluorobenzamide (3b)**<sup>2</sup> The compound was obtained as white solids with a yield of 82%.  $R_f = 0.30$  (hexane/ethyl acetate 8:2); <sup>1</sup>H NMR (500 MHz, CDCl<sub>3</sub>)  $\delta$  7.8 (m, 2H), 7.3 (m, 5H), 7.0 (t,  $J = 8.6$  Hz, 2H), 6.9 (s, 1H), 4.6 (d,  $J = 5.7$  Hz, 2H). HRMS (EIQTOF, [M+H]<sup>+</sup>) calculated for C<sub>14</sub>H<sub>12</sub>FNO: 230.1049. found:

**N-benzyl-2-chlorobenzamide (3c)**<sup>3</sup> The compound was obtained as off-white solids with a yield of 88%.  $R_f = 0.45$  (hexane/ethyl acetate 7:3); <sup>1</sup>H NMR (500 MHz, CDCl<sub>3</sub>)  $\delta$  7.49 (dd,  $J = 7.55, 1.72$  Hz, 1H), 7.33 – 7.18 (m, 8H), 6.83 (s, 1H), 4.52 (d,  $J = 5.82$  Hz, 2H). HRMS (TOF MS ES<sup>+</sup>, [M+H]<sup>+</sup>) calculated for C<sub>14</sub>H<sub>12</sub>ClNO: 246.0726.

**N-benzyl-4-chlorobenzamide (3d)**<sup>4</sup> The compound was obtained as off-white solids with a yield of 87%.  $R_f = 0.45$  (hexane/ethyl acetate 7:3); <sup>1</sup>H NMR (500 MHz, CDCl<sub>3</sub>)  $\delta$  7.71 (dd, 2H), 7.41 – 7.27 (m, 7H), 6.53 (s, 1H), 4.61 (d,  $J = 5.68$  Hz, 2H). HRMS (EIQTOF, [M+H]<sup>+</sup>) calculated for C<sub>14</sub>H<sub>12</sub>ClNO: 246.1342.

**N-benzyl-2,4-dichlorobenzamide (3e)**<sup>5</sup> The compound was obtained as off-white solids with a yield of 74%.  $R_f = 0.45$  (hexane/ethyl acetate 7:3); <sup>1</sup>H NMR (500 MHz, CDCl<sub>3</sub>)  $\delta$  7.48 (d,  $J = 7.99$  Hz, 1H), 7.43 – 7.10 (m, 7H), 6.82 (s, 1H), 4.55 (d,  $J = 5.39$  Hz, 2H).

**N-benzyl-2-methylbenzamide (3f)**<sup>6</sup> The compound was obtained as orange solids with a yield of 85%.  $R_f = 0.53$  (hexane/ethyl acetate 7:3); <sup>1</sup>H NMR (500 MHz, CDCl<sub>3</sub>)  $\delta$  7.2 (m, 7H), 7.0 (m, 1H), 7.0 (t, 1H), 6.5 (s, 1H), 4.4 (d,  $J = 5.7$  Hz, 2H), 2.2 (s, 3H). HRMS (EIQTOF, [M+H]<sup>+</sup>) calculated for C<sub>15</sub>H<sub>15</sub>NO: 226.1992.

**N-benzyl-4-methoxybenzamide (3g)**<sup>6</sup> The compound was obtained as white solids with a yield of 83%.  $R_f = 0.33$  (hexane/ethyl acetate 7:3); <sup>1</sup>H NMR (500 MHz, CDCl<sub>3</sub>)  $\delta$  7.7 (m, 2H), 7.2 (m, 4H), 7.1 (m, 1H), 6.8 (t,  $J = 5.8$  Hz, 1H), 6.7 (m, 2H), 4.4 (d,  $J = 5.8$  Hz, 2H), 3.7 (s, 3H). HRMS (EIQTOF, [M+H]<sup>+</sup>) calculated for C<sub>15</sub>H<sub>15</sub>NO<sub>2</sub>: 242.1873.

**N-benzyl-2-mercaptobenzamide (3h)** The compound was obtained as orange solids with a yield of 86%.  $R_f = 0.53$  (hexane/ethyl acetate 7:3); <sup>1</sup>H NMR (500 MHz, CDCl<sub>3</sub>)  $\delta$  8.0 (d, 1H), 7.5 (t,  $J = 8.3, 7.1, 1.3$  Hz, 1H), 7.4 (d,  $J = 8.1$  Hz, 1H), 7.4 – 7.2 (m, 6H), 5.0 (s, 2H).

**N-benzyl-4-nitrobenzamide (3i)**<sup>7</sup> The compound was obtained as off-white solids with a yield of 90%.  $R_f = 0.53$  (hexane/ethyl acetate 7:3); <sup>1</sup>H NMR (500 MHz, CDCl<sub>3</sub>)  $\delta$  8.23 (d,  $J = 8.82$  Hz, 2H), 7.93 (d,  $J = 8.83$  Hz, 2H), 7.39 – 7.26



(m, 5H), 6.81 – 6.70 (m, 1H), 4.63 (d,  $J = 5.68$  Hz, 2H). HRMS (EIQTOF,  $[M+H]^+$ ) calculated for  $C_{14}H_{12}N_2O_3$ : 257.0968.

**N-Benzylpicolinamide (3j)**<sup>8</sup> The compound was obtained as white solids with a yield of 78%.  $R_f = 0.53$  (hexane/ethyl acetate 6:4);  $^1H$  NMR (500 MHz,  $CDCl_3$ )  $\delta$  8.4 (ddd,  $J = 4.8, 1.8, 0.9$  Hz, 1H), 8.3 (s, 1H), 8.1 (dt,  $J = 7.9, 1.1$  Hz, 1H), 7.7 (td,  $J = 7.7, 1.7$  Hz, 1H), 7.3 – 7.2 (m, 6H), 4.6 (d,  $J = 6.1$  Hz, 2H).

**N-benzylbutyramide (3k)**<sup>9</sup> The compound was obtained as off-white solids with a yield of 79%.  $R_f = 0.53$  (hexane/ethyl acetate 7:3);  $^1H$  NMR (500 MHz,  $CDCl_3$ )  $\delta$  7.3 – 7.1 (m, 5H), 6.0 (s, 1H), 4.3 (d,  $J = 5.7$  Hz, 2H), 2.1 (t,  $J = 7.2$  Hz, 2H), 1.6 – 1.5 (m, 2H), 0.9 (t,  $J = 7.4$  Hz, 3H).

**N-Benzyl-2-(4-isobutylphenyl)propanamide (3l)**<sup>10</sup> The compound was obtained as white solids with a yield of 68%.  $R_f = 0.53$  (hexane/ethyl acetate 7:3);  $^1H$  NMR (500 MHz,  $CDCl_3$ )  $\delta$  7.2 – 7.1 (m, 5H), 7.0 – 7.0 (m, 4H), 5.9 (s, 1H), 4.2 (d,  $J = 5.86$  Hz, 2H), 3.5 (q,  $J = 7.16$  Hz, 1H), 2.3 (d,  $J = 7.20$  Hz, 2H), 1.8 – 1.7 (m, 1H), 1.4 (d,  $J = 7.21$  Hz, 3H), 0.8 (d,  $J = 6.68$  Hz, 6H).

**N-benzyl-N-methylbenzamide (5a)**<sup>11</sup> The compound was obtained as colorless oil with a yield of 84%.  $R_f = 0.53$  (hexane/ethyl acetate 8:2);  $^1H$  NMR (500 MHz,  $CDCl_3$ )  $\delta$  7.5 – 7.0 (m, 10H), 4.6 (s, 1H), 4.4 (s, 1H), 2.9 (s, 1H), 2.7 (s, 2H).

**N-(4-fluorobenzyl)benzamide (5b)**<sup>9</sup> The compound was obtained as off-white solids with a yield of 82%.  $R_f = 0.53$  (hexane/ethyl acetate 7:3);  $^1H$  NMR (500 MHz,  $CDCl_3$ )  $\delta$  7.7 – 7.7 (m, 2H), 7.4 – 7.4 (m, 1H), 7.3 – 7.3 (m, 2H), 7.3 – 7.2 (m, 2H), 7.0 – 6.8 (m, 2H), 6.7 (s, 1H), 4.5 (d,  $J = 5.8$  Hz, 2H).

**N-(2-chlorobenzyl)benzamide (5c)**<sup>12</sup> The compound was obtained as off-orange solids with a yield of 81%.  $R_f = 0.53$  (hexane/ethyl acetate 9:1);  $^1H$  NMR (500 MHz,  $CDCl_3$ )  $\delta$  7.76 (d,  $J = 6.96$  Hz, 2H), 7.48 – 7.41 (m, 1H), 7.39 – 7.30 (m, 4H), 7.20 – 7.15 (m, 2H), 7.04 (s, 1H), 4.65 (d,  $J = 5.98$  Hz, 2H).

**N-phenylbenzamide (5d)**<sup>13</sup> The compound was obtained as off-white solids with a yield of 76%.  $R_f = 0.53$  (hexane/ethyl acetate 7:3);  $^1H$  NMR (500 MHz,  $CDCl_3$ )  $\delta$  7.89 – 7.83 (m, 3H), 7.66 – 7.61 (m, 2H), 7.58 – 7.51 (m, 1H), 7.51 – 7.44 (m, 2H), 7.36 (d,  $J = 7.48$  Hz, 2H), 7.15 (t,  $J = 7.38$  Hz, 1H).

## N-benzylbenzamide (3a)

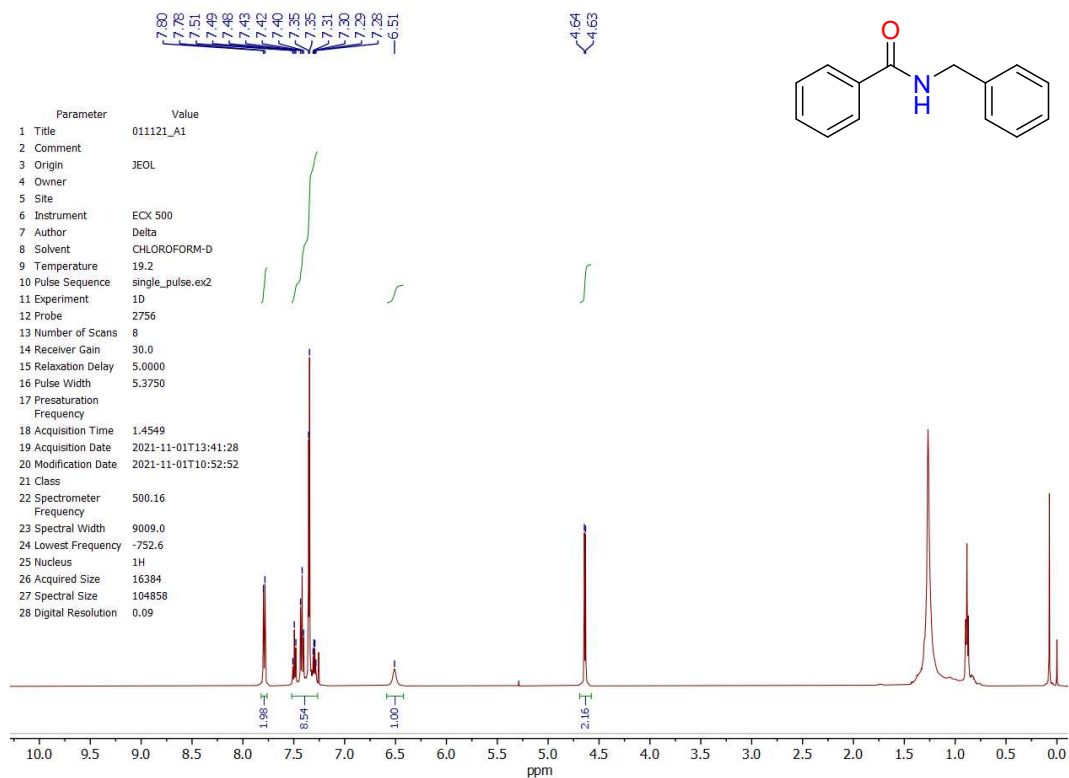

## N-benzyl-4-fluorobenzamide (3b)

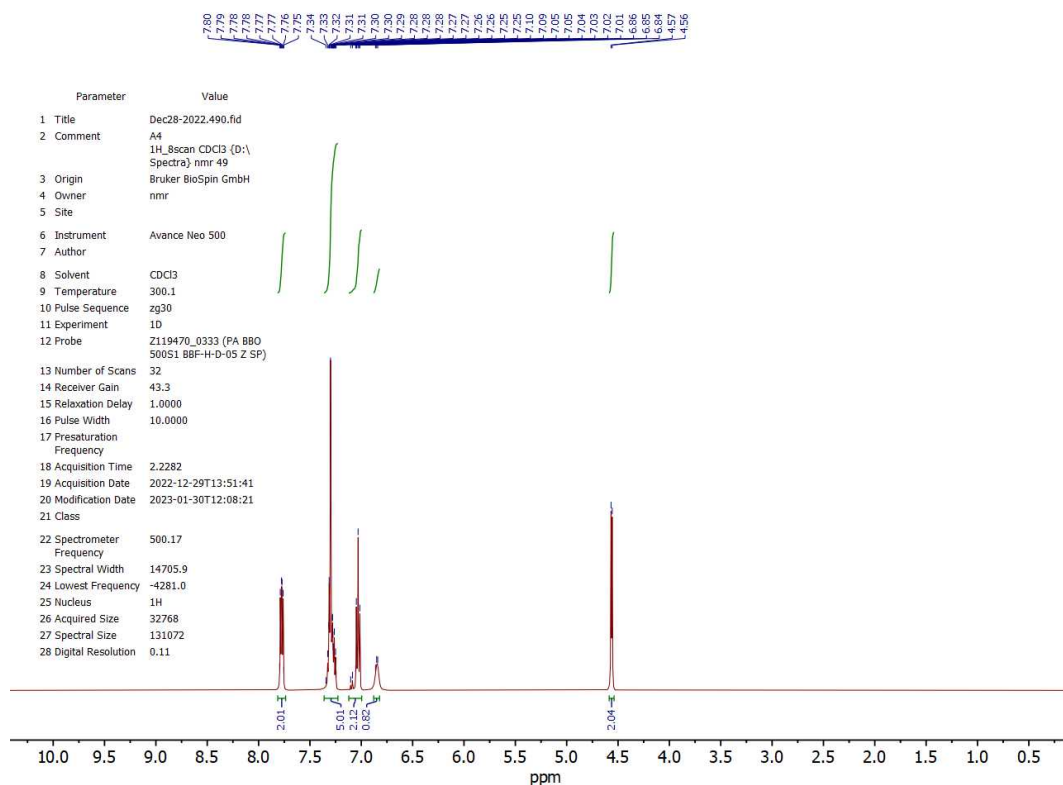

### N-benzyl-2-chlorobenzamide (3c)

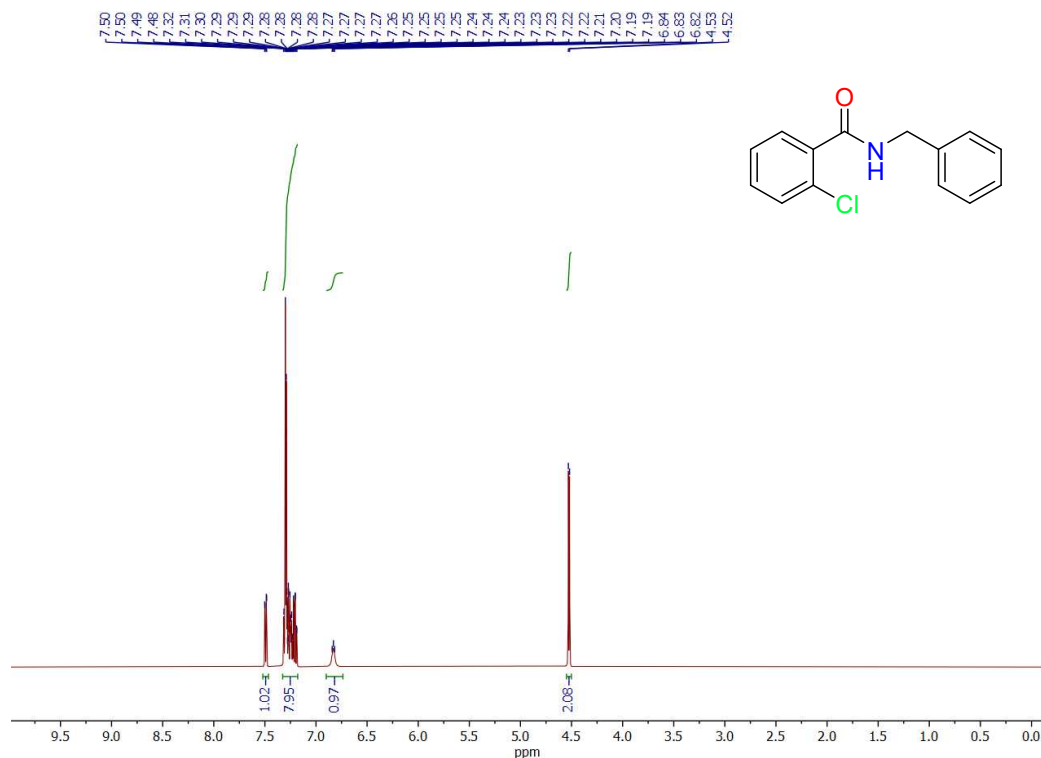

### N-benzyl-4-chlorobenzamide (3d)

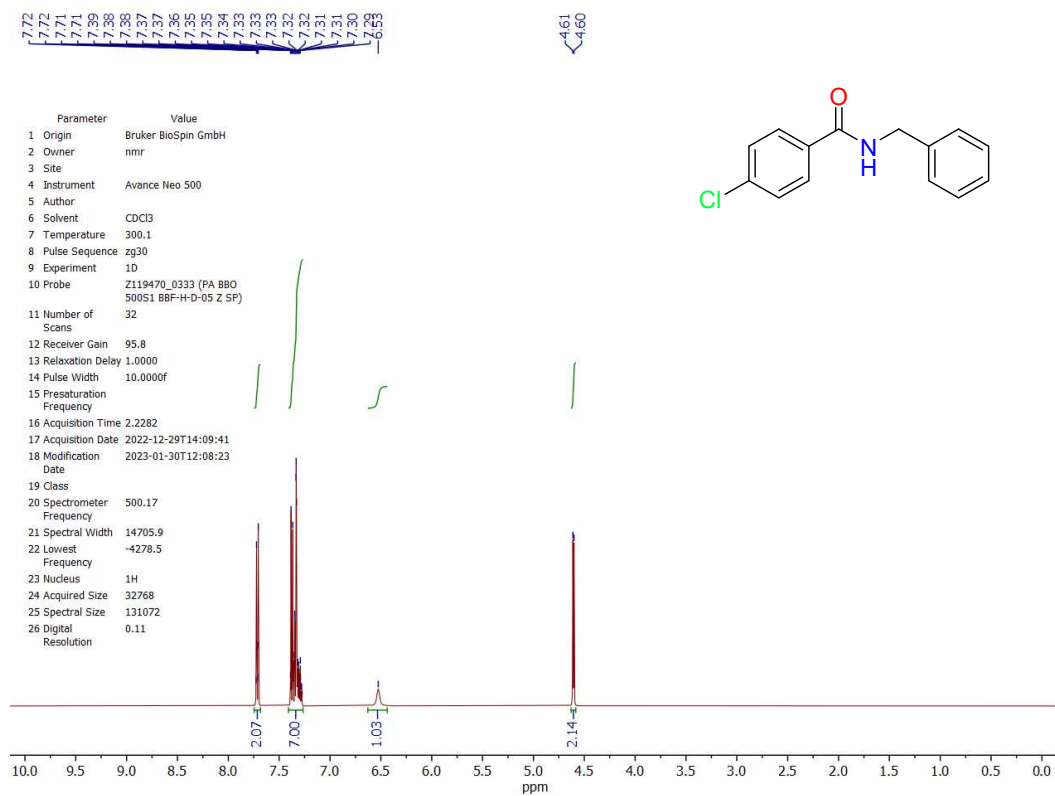

## N-benzyl-2,4-dichlorobenzamide (3e)

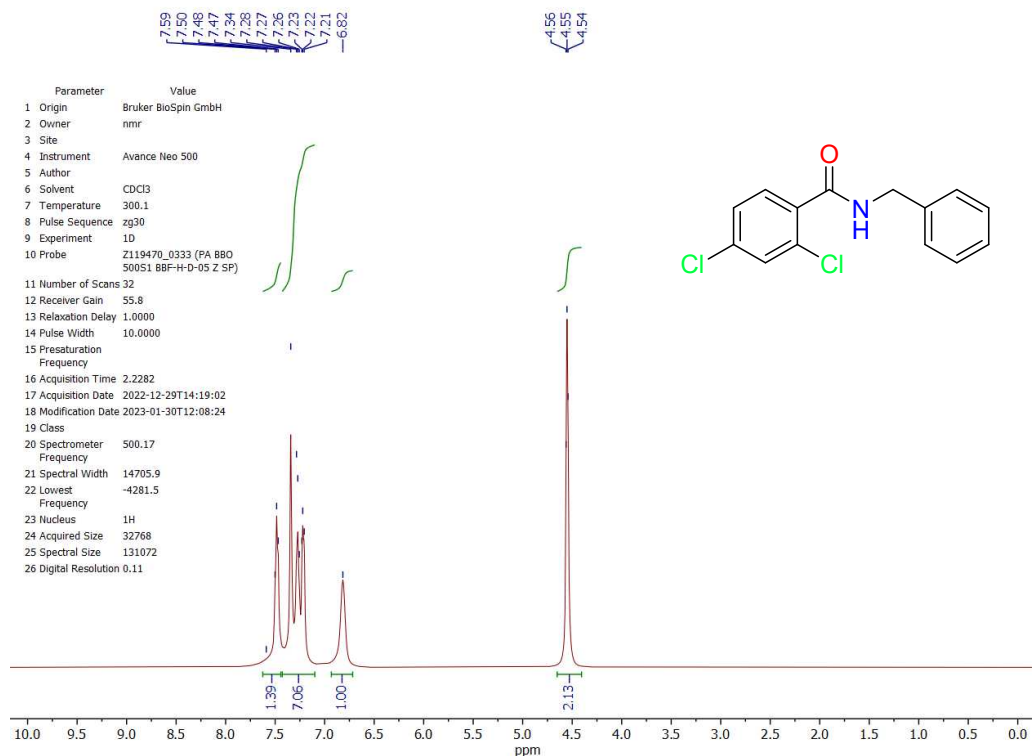

## N-benzyl-2-methylbenzamide (3f)

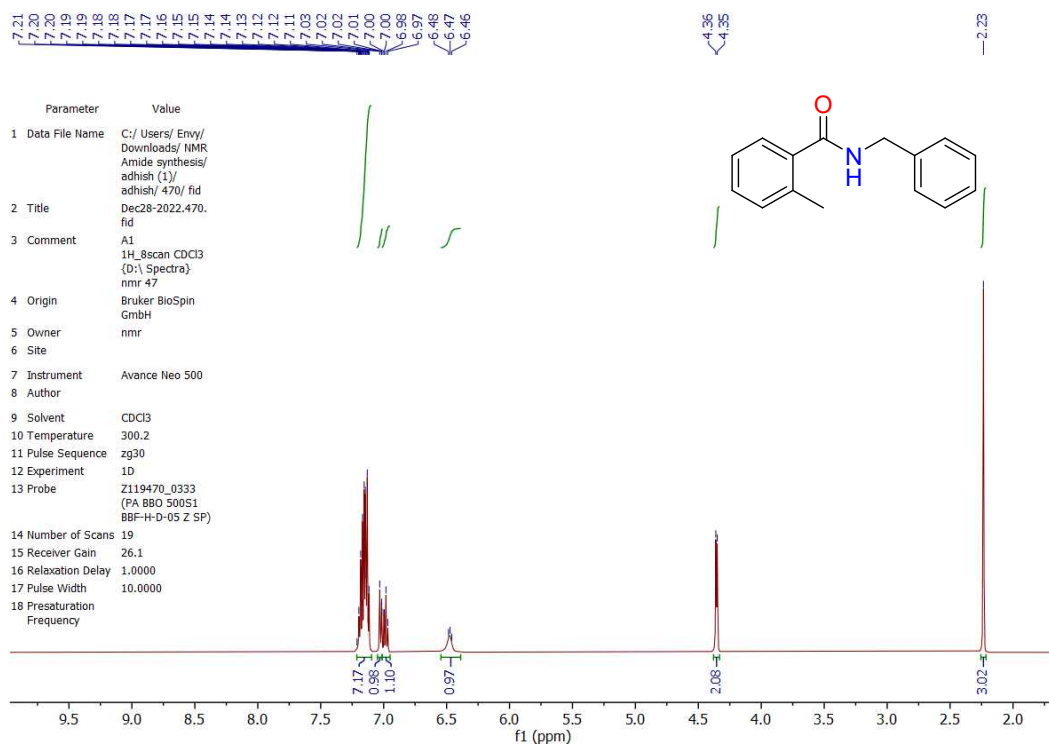

## N-benzyl-4-methoxybenzamide (3g)

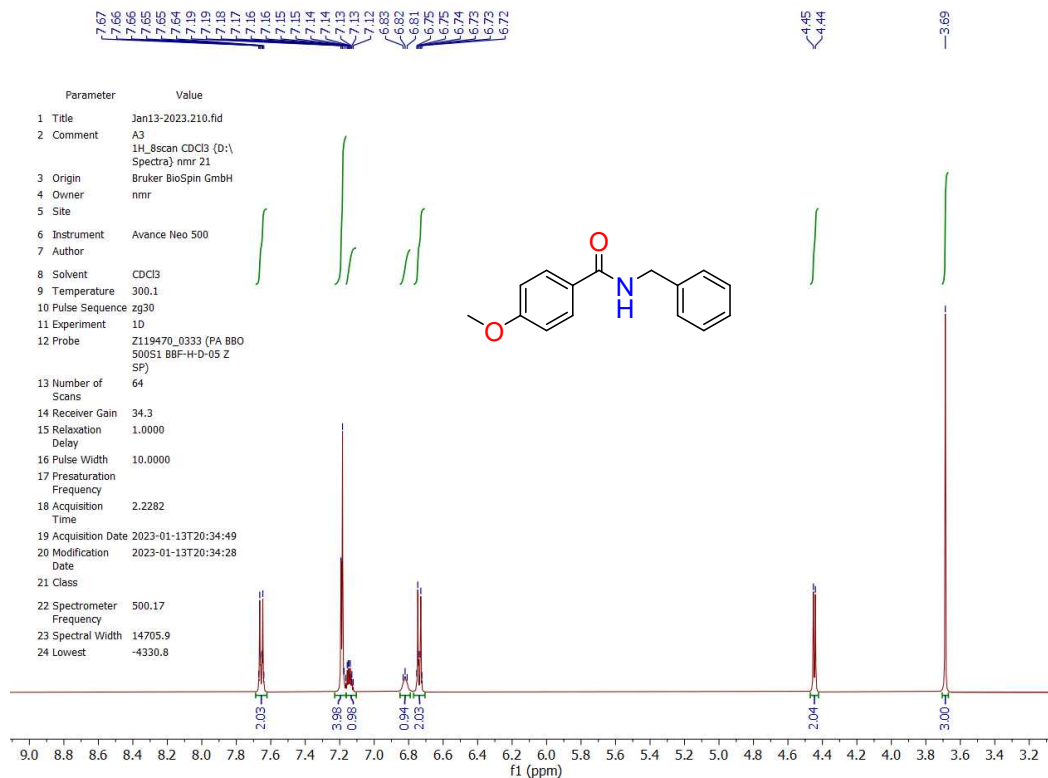

## N-benzyl-2-mercaptobenzamide (3h)

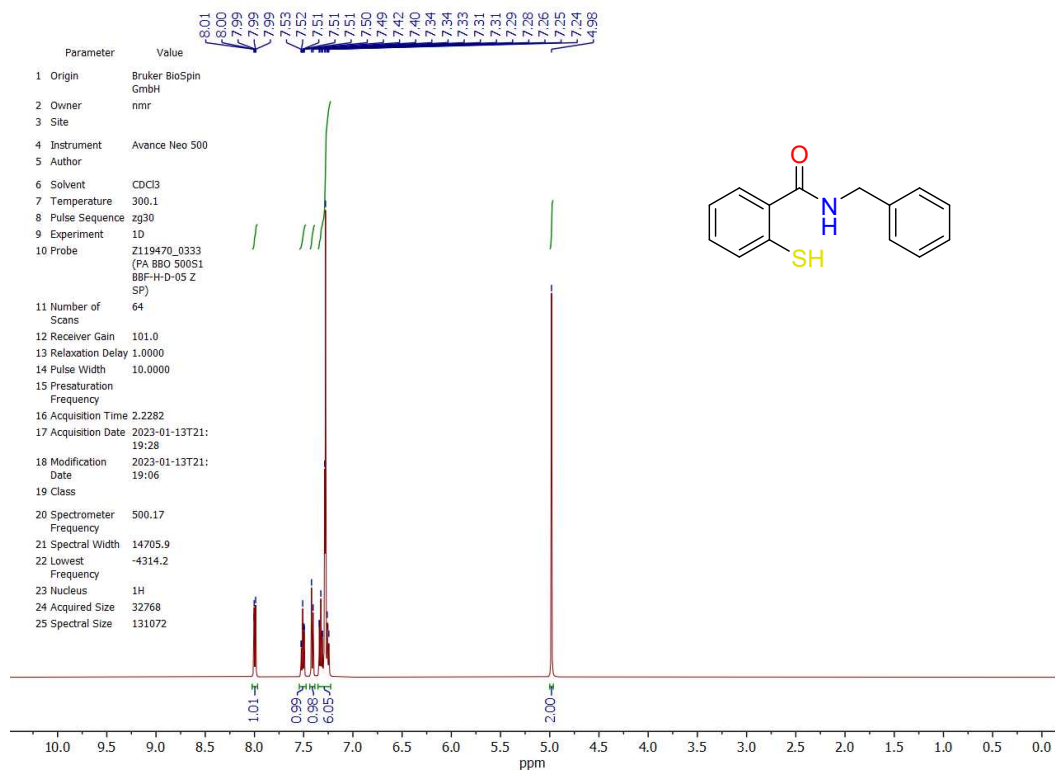



## N-benzylbutyramide (3k)

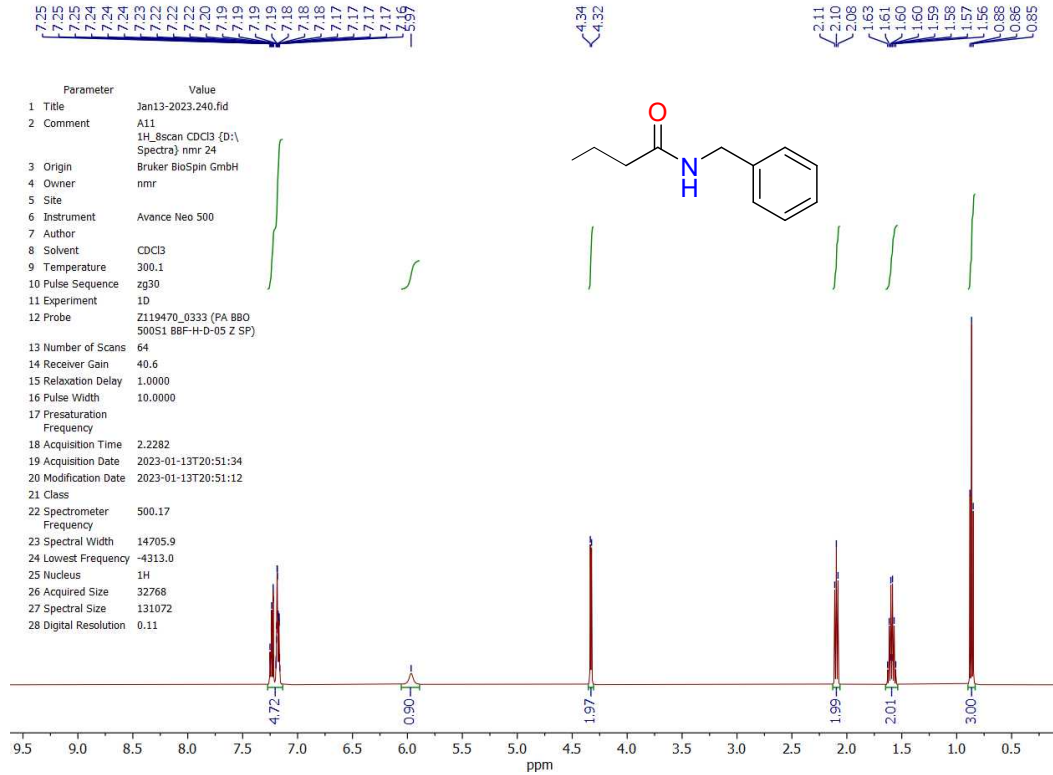

## N-Benzyl-2-(4-isobutylphenyl)propanamide (3l)

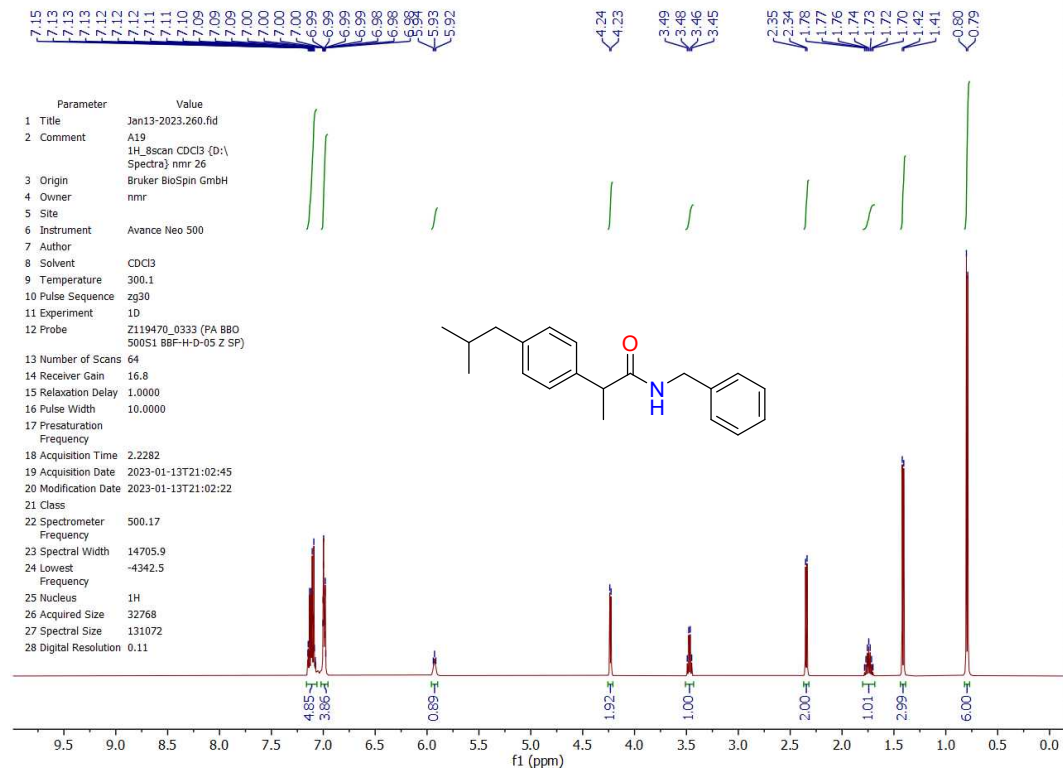

## N-benzyl-N-methylbenzamide (5a)

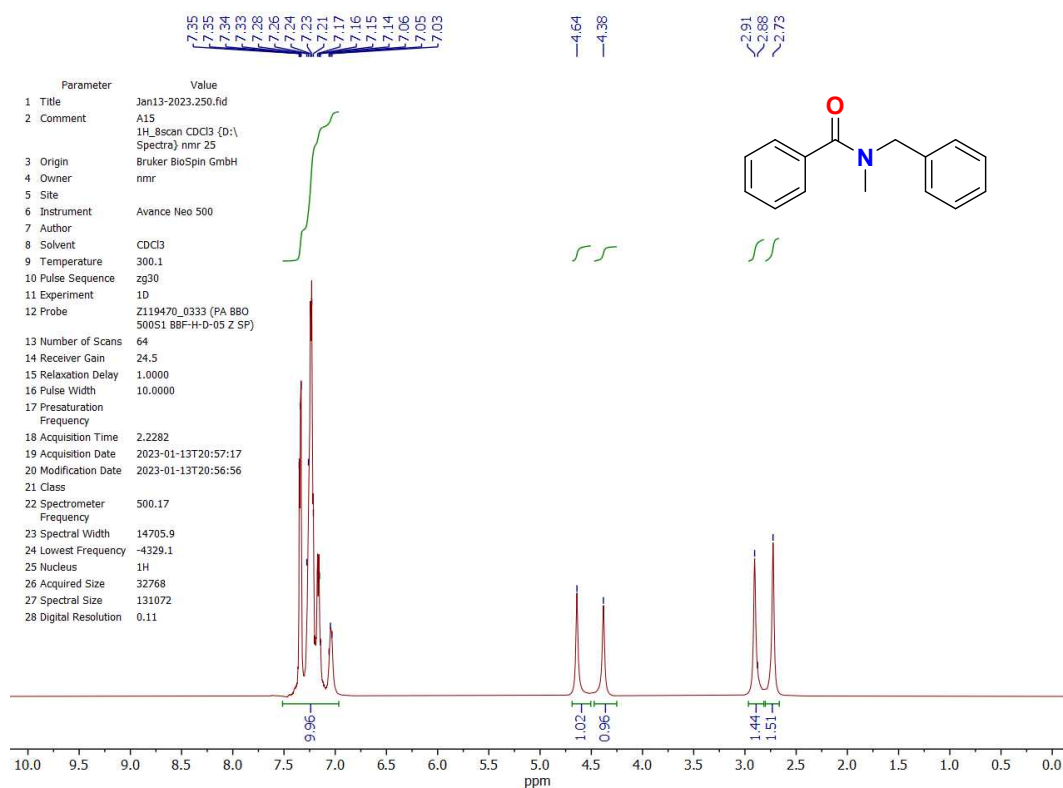

## N-(4-fluorobenzyl)benzamide (5b)

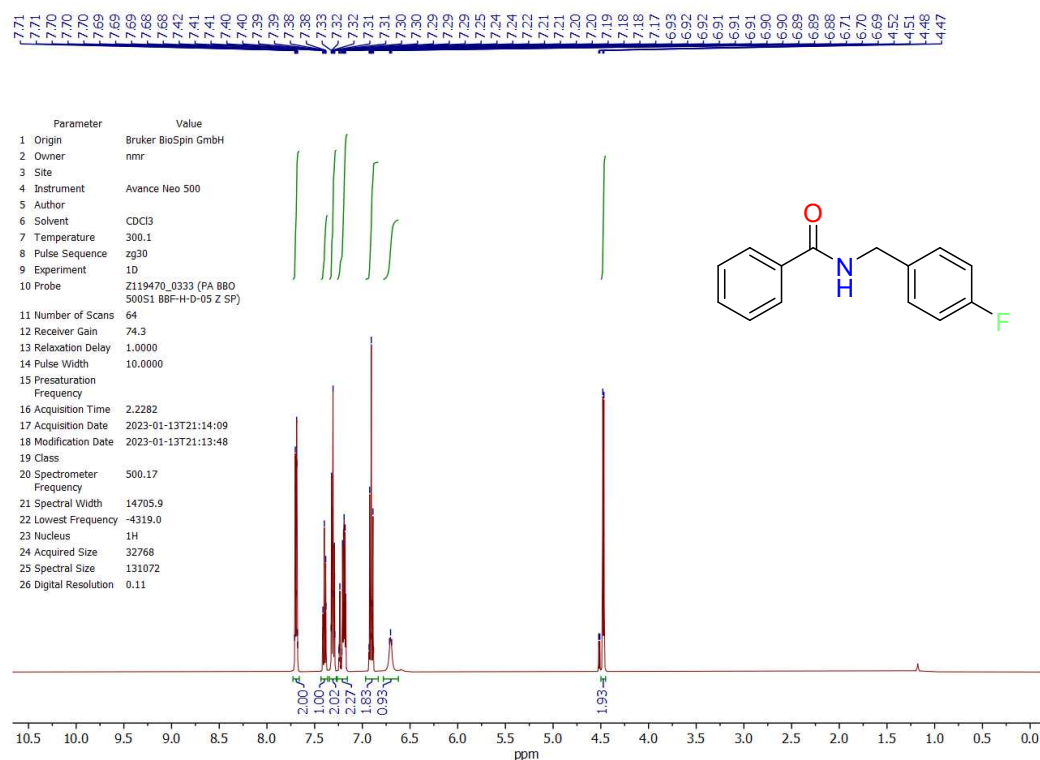



### N-(2-chlorobenzyl)benzamide (5c)

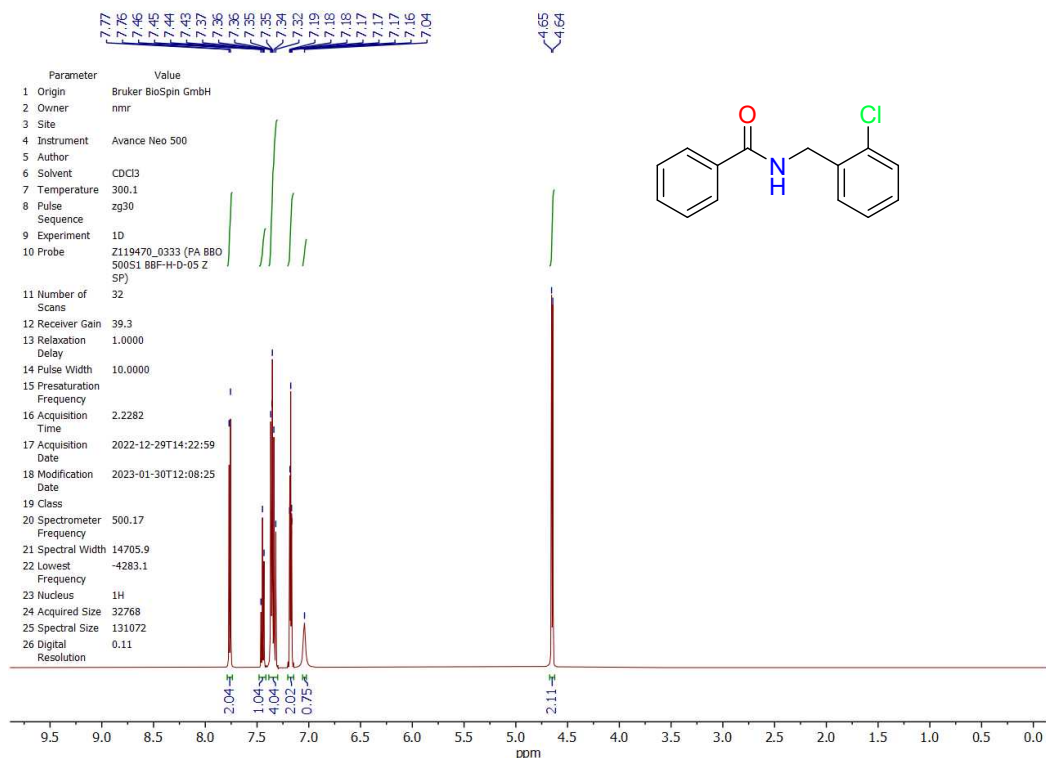

### N-phenylbenzamide (5d)

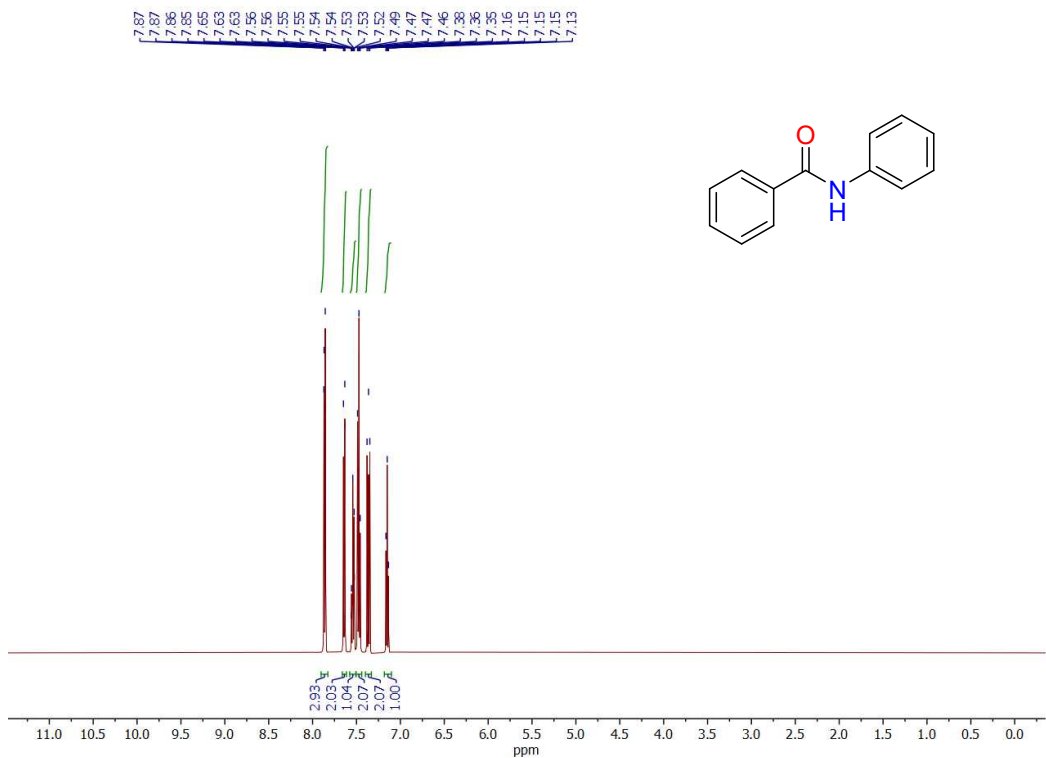

## References

- 1 A. Ojeda-Porras, A. Hernández-Santana and D. Gamba-Sánchez, *Green Chem.*, 2015, **17**, 3157–3163.
- 2 C. J. Smedley, A. S. Barrow, C. Spiteri, M.-C. Giel, P. Sharma and J. E. Moses, *Chem. Eur. J.*, 2017, **23**, 9990–9995.
- 3 P. Thansandote, D. G. Hulcoop, M. Langer and M. Lautens, *J. Org. Chem.*, 2009, **74**, 1673–1678.
- 4 B. N. Atkinson, A. Rosie Chhatwal, H. V. Lomax, J. W. Walton and J. M. J. Williams, *Chem. Commun.*, 2012, **48**, 11626–11628.
- 5 N. Iqbal and E. J. Cho, *J. Org. Chem.*, 2016, **81**, 1905–1911.
- 6 Z. Huang, J. E. Reilly and R. N. Buckle, *Synlett*, 2007, **2007**, 1026–1030.
- 7 S. Jamalifard, J. Mokhtari and Z. Mirjafary, *RSC Adv.*, 2019, **9**, 22749–22754.
- 8 H. Morimoto, R. Fujiwara, Y. Shimizu, K. Morisaki and T. Ohshima, *Org. Lett.*, 2014, **16**, 2018–2021.
- 9 N. Wang, X. Zou, J. Ma and F. Li, *Chem. Commun.*, 2014, **50**, 8303–8305.
- 10 M. T. Sabatini, L. T. Boulton and T. D. Sheppard, *Sci. Adv.*, 2017, **3**, e1701028.
- 11 Z. Lu, G. P. A. Yap and D. S. Richeson, *Organometallics*, 2001, **20**, 706–712.
- 12 P. Xu, F.-S. Han and Y.-H. Wang, *Adv. Synth. Catal.*, 2015, **357**, 3441–3446.
- 13 A. Kumar and A. K. Bishnoi, *RSC Adv.*, 2014, **4**, 41631–41635.
